# Supplementary material for: An Artificial Intelligence-Enabled ECG Algorithm for the Prediction and Localization of Angiography-Proven Coronary Artery Disease
Source: MDPI journal article supplement (doi:10.3390/biomedicines10020394), 2022-02-07
Supplement: s1 [file s1]

**Supplement Table S1.** Application programming interfaces (API)s and parameter settings.

| Hyperparameter            | Image input model        | Time-series input model             |
|---------------------------|--------------------------|-------------------------------------|
| Convolutional kernel size | Set by default           | [3, 5, 7, 9, 11, 13, 15, 17, 19,21] |
| Epoch                     | 200                      | 400                                 |
| Batch size                | 32                       | 32                                  |
| EarlyStopping patience    | 100                      | 200                                 |
| Dropout rate              | 0.5                      | 0.5                                 |
| Optimizer                 | Adam                     | Adam                                |
| Learning rate             | 10-3                     | 10-3                                |
| Metrics                   | Accuracy                 | Accuracy                            |
| Loss function             | Categorical crossentropy | Categorical crossentropy            |

**Supplement Table S2.** Randomly selected subsets test results.

| Image input model |                 |             |                 |                 |                 |                 |                 |
|-------------------|-----------------|-------------|-----------------|-----------------|-----------------|-----------------|-----------------|
| Subset            | Acc.            | AUC         |                 |                 |                 | Precision       | Recall          |
|                   |                 | NOR         | LAD             | LCX             | RCA             |                 |                 |
| 1                 | 0.698<br>±0.01  | 1.0<br>±0.0 | 0.892<br>±0.017 | 0.764<br>±0.027 | 0.796<br>±0.018 | 0.699<br>±0.016 | 0.696<br>±0.008 |
| 2                 | 0.7<br>±0.018   | 1.0<br>±0.0 | 0.850<br>±0.014 | 0.782<br>±0.019 | 0.824<br>±0.033 | 0.705<br>±0.015 | 0.698<br>±0.015 |
| 3                 | 0.738<br>±0.007 | 1.0<br>±0.0 | 0.914<br>±0.012 | 0.782<br>±0.022 | 0.828<br>±0.029 | 0.743<br>±0.005 | 0.736<br>±0.006 |
| AVG               | 0.712<br>±0.012 | 1.0<br>±0.0 | 0.885<br>±0.016 | 0.776<br>±0.013 | 0.816<br>±0.016 | 0.716<br>±0.012 | 0.71<br>±0.011  |

AUC: The area under curve, LAD: Left anterior descending, LCX: Left circumflex, RCA: Right coronary artery, AVG: Average.
